# Supplementary material for: Effect of Slow-Release Urea Administration on Production Performance, Health Status, Diet Digestibility, and Environmental Sustainability in Lactating Dairy Cows
Source: Animals (Basel). 2021 Aug 14;11(8):2405. doi: 10.3390/ani11082405 (PMC8388657; doi:10.3390/ani11082405)
Supplement: Supplementary file 1 [file animals-11-02405-s001.zip › animals-1303832-supplementary.pdf]

Supplementary Table S1 Technical information about the product Protigen used in the present trial: particle size, measured in millimetres, and in vitro release rate at different time point.

| Parameter                                   | Value |
|---------------------------------------------|-------|
| <b>Particle size, mm</b>                    |       |
| <i>% of the product between 1.5-2.00 mm</i> | 97    |
| <i>% of the product &lt;1.5 mm</i>          | 3     |
| <b>Release rate, %</b>                      |       |
| <i>At 1h</i>                                | 22.3  |
| <i>At 2h</i>                                | 33.1  |
| <i>At 3h</i>                                | 42.2  |
| <i>At 4h</i>                                | 49.1  |
| <i>At 5h</i>                                | 50.4  |
| <i>At 6h</i>                                | 60.2  |
| <i>At 7h</i>                                | 70.3  |
| <i>At 24h</i>                               | 99.1  |
